# Supplementary material
Source: PubMed Central journal article supplement (PMC9247340)
Supplement: mmc1.pdf [file mmc1.pdf]

**Biophysical Journal, Volume 121**

**Supplemental information**

**Unraveling the binding mode of a methamphetamine aptamer: A spectroscopic and calorimetric study**

**Clement Sester, Jordan A.J. McCone, Anindita Sen, Jan Vorster, Joanne E. Harvey, and Justin M. Hodgkiss**

# Supporting Information

## Unravelling the binding mode of a methamphetamine aptamer: a spectroscopic and calorimetric investigation

Clement Sester<sup>1,2</sup>, Jordan AJ McCone<sup>3</sup>, Anindita Sen<sup>1,2</sup>, Ian Vorster<sup>2</sup>, Joanne E Harvey<sup>3</sup>, and Justin M Hodgkiss<sup>1,2,\*</sup>

<sup>1</sup> The MacDiarmid Institute for Advanced Materials and Nanotechnology, Victoria University of Wellington PO Box 600, Wellington 6040, New Zealand

<sup>2</sup> School of Chemical and Physical Sciences, Victoria University of Wellington, PO Box 600, Wellington 6040, New Zealand

<sup>3</sup> Centre for Biodiscovery, School of Chemical and Physical Sciences, Victoria University of Wellington, PO Box 600, Wellington 6140, New Zealand

\* To whom correspondence should be addressed. Tel: +64 (0)4 463 6983; Email: justin.hodgkiss@vuw.ac.nz

### Contents:

**Equation S1.** Binding constant equations related to the Lock-and-Key, Conformational Selection, and Induced Fit binding models. .... 2

**Table S1.** Full Meth-aptamer sequences used in the study. Buffer conditions are 2 mM Tris-HCl pH 7.5, 10 mM NaCl, 0.5 mM KCl, 0.2 mM MgCl<sub>2</sub> and 0.1 mM CaCl<sub>2</sub>..... 2

**Figure S1.** Meth titration (0  $\mu$ M (a), 0.2  $\mu$ M (b), 0.5  $\mu$ M (c) and 1  $\mu$ M (d)) for the Meth aptamers family. A fluorescence decrease at 520 nm is monitored for (A) Aptamer-2, (C) Aptamer-1, (D) Aptamer-3 and (E) Aptamer-4. (B) Linearization of the Langmuir isotherm for each aptamer. .... 3

**Figure S2.** CD experiments for the three other Meth aptamers (A) Aptamer-1, (B) Aptamer-3 and (C) Aptamer-4..... 4

**Figure S3.** Aptamer-2-40mer <sup>1</sup>H-NMR spectrum..... 5

**Figure S4.** Meth <sup>1</sup>H-NMR spectrum..... 5

**Figure S5.** Partition results for Aptamer-2-40mer obtained from RNAstructure..... 6

Binding constant equation related to the “**Lock and Key**” equilibrium is the following:  $K_D^{obs} = \frac{k_{off}}{k_{on}}$ . Binding constant equations related to the “**Conformational Selection**” equilibrium are the following:  $K_D^{obs} = K_{disso} (1 + K_{iso})$  where  $K_{disso} = \frac{k'_{off}}{k'_{on}}$  and  $K_{iso} = \frac{k'_{rev}}{k'_{for}}$ . Binding constant equations related to the “**Induced Fit**” equilibrium are the following:  $K_D^{obs} = K_{disso} \frac{K_{iso}}{(1+K_{iso})}$  where  $K_{disso} = \frac{k''_{off}}{k''_{on}}$  and  $K_{iso} = \frac{k''_{rev}}{k''_{for}}$ .

**Equation S1.** Binding constant equations related to the Lock-and-Key, Conformational Selection, and Induced Fit binding models.

| <b>Aptamer identification</b>  | <b>Sequence 5'-3'</b>                                                           |
|--------------------------------|---------------------------------------------------------------------------------|
| <b>Aptamer-1</b>               | ATACGAGCTTGTTCAATAGCGTTTAGGCGTTCATTCATCCCGCTATC<br>TGGCTGTATCGTGATAGTAAGAGCAATC |
| <b>Aptamer-2</b>               | ATACGAGCTTGTTCAATAGCGTTTCTATCTGGCTGTATCGTGATAGT<br>AAGAGCACTAATGATAGTAAGAGCAATC |
| <b>Aptamer-3</b>               | ATACGAGCTTGTTCAATAGCGTTTAGCGTTCAATTCATCCCGCTATC<br>CTGGCTGTATCGTGATAGTAGAACAATC |
| <b>Aptamer-4</b>               | ATACGAGCTTGTTCAATAGCGTTTTACGTTCAATTCATCCCGCTATC<br>TGGCTGTATCGTGATAGTAAGAGCAATC |
| <b>Aptamer-2-40mer</b>         | GCGTTTCTATCTGGCTGTATCGTGATAGTAAGAGCACTAA                                        |
| <b>Mutated-Aptamer-2-40mer</b> | GCGTTTCGTCCTGGCTGTATCGTGATAGTAAGAGCACTAA                                        |

**Table S1.** Full Meth-aptamer sequences used in the study. Buffer conditions are 2 mM Tris-HCl pH 7.5, 10 mM NaCl, 0.5 mM KCl, 0.2 mM MgCl<sub>2</sub> and 0.1 mM CaCl<sub>2</sub>.

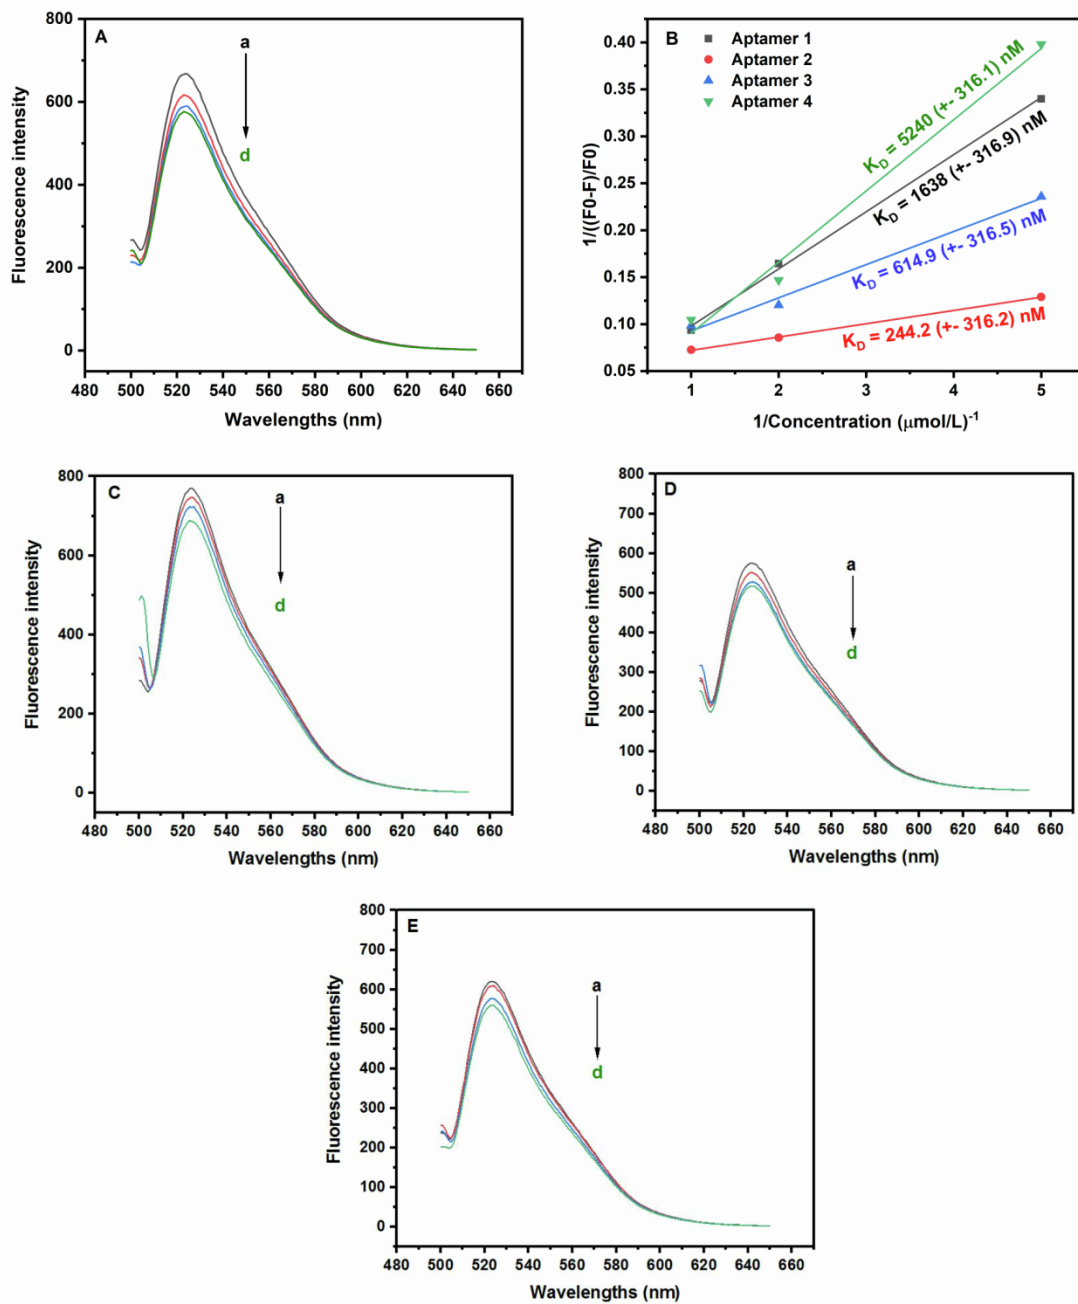

**Figure S1.** Meth titration (0  $\mu\text{M}$  (a), 0.2  $\mu\text{M}$  (b), 0.5  $\mu\text{M}$  (c) and 1  $\mu\text{M}$  (d)) for the Meth aptamers family. A fluorescence decrease at 520 nm is monitored for (A) Aptamer-2, (C) Aptamer-1, (D) Aptamer-3 and (E) Aptamer-4. (B) Linearization of the Langmuir isotherm for each aptamer.

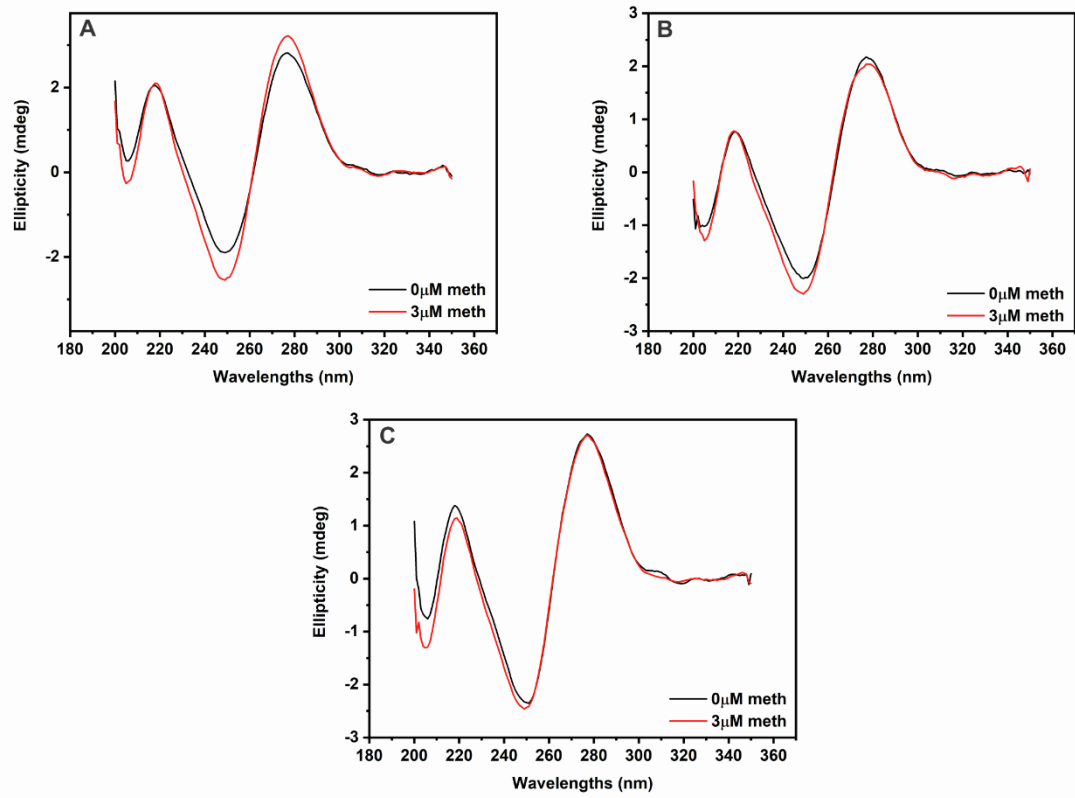

**Figure S2.** CD experiments for the three other Meth aptamers (A) Aptamer-1, (B) Aptamer-3 and (C) Aptamer-4.

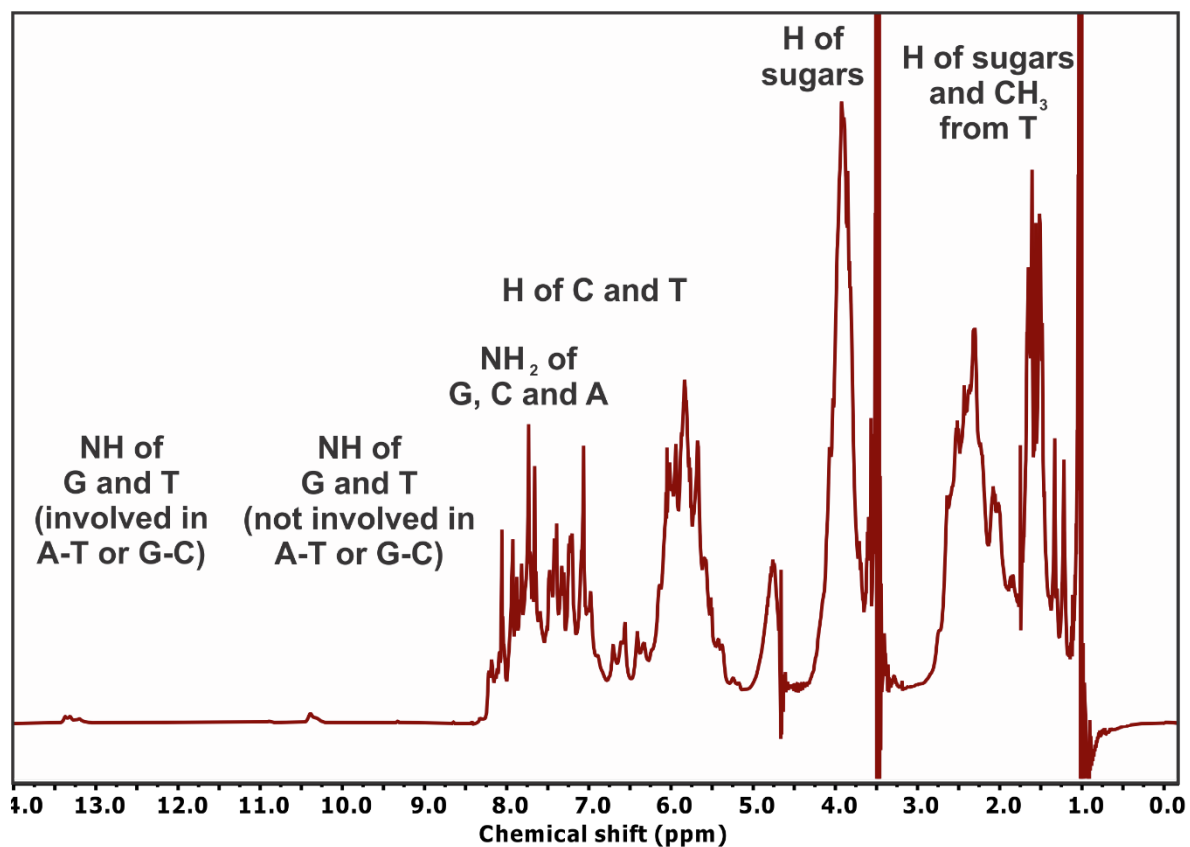

Figure S3. Aptamer-2-40mer  $^1\text{H}$ -NMR spectrum.

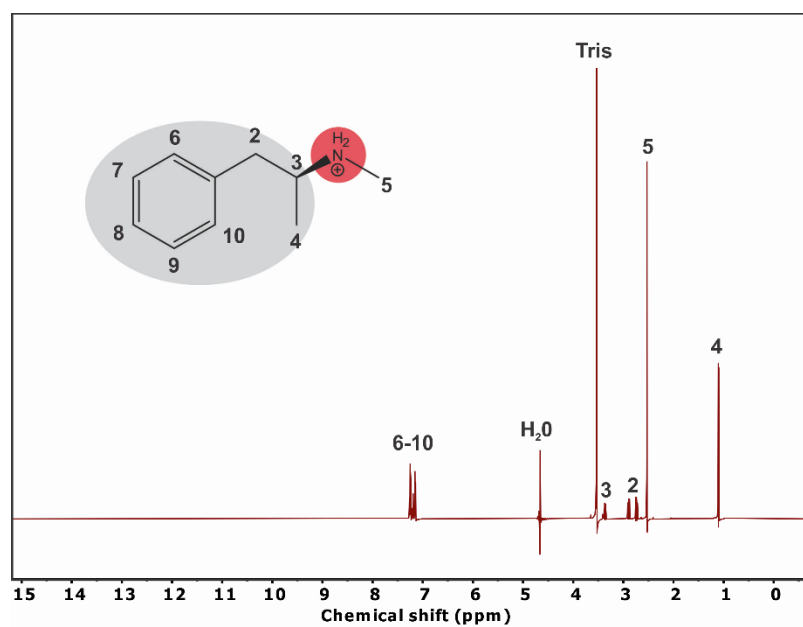

Figure S4. Meth  $^1\text{H}$ -NMR spectrum.

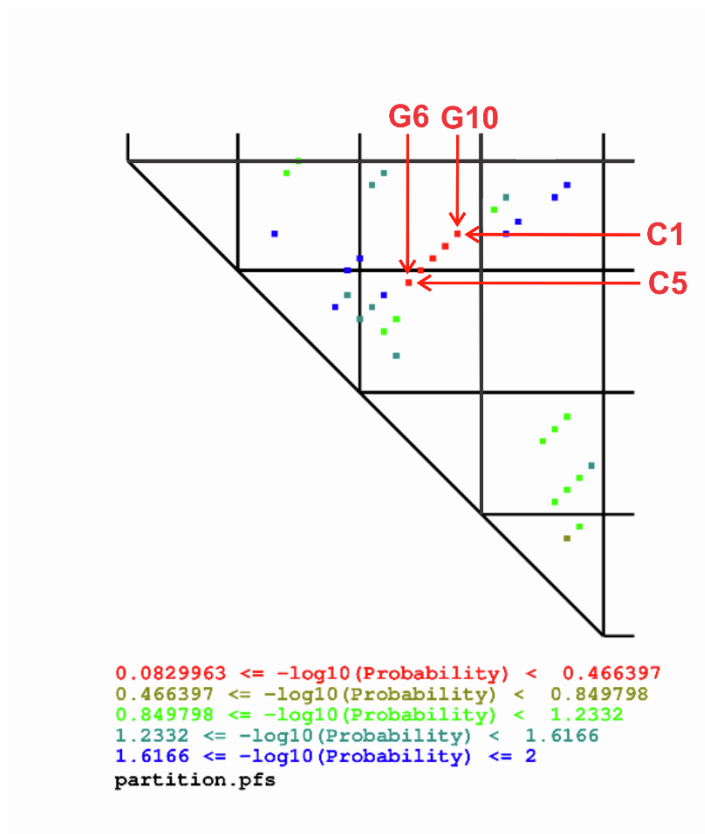

**Figure S5.** Partition results for Aptamer-2-40mer obtained from *RNAstructure*.
